# Supplementary material for: Memory and Fitness Optimization of Bacteria under Fluctuating Environments
Source: PubMed Central journal article supplement (PMC4177670; doi:10.1371/journal.pgen.1004556), 2014-09-25

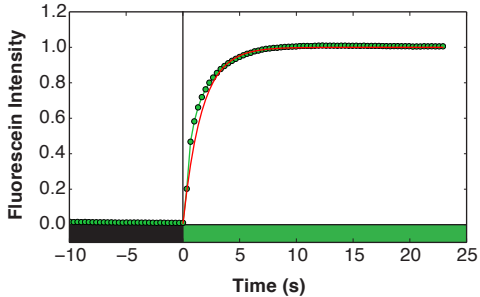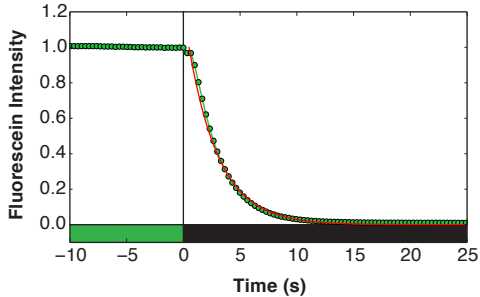

Supplement: pgen.1004556.s001.pdf [file pgen.1004556.s001.pdf]
